# Supplementary material
Source: publisher figshare collection journal article supplement (https://rs.figshare.com/ndownloader/files/13851044)
Supplement: Supplementary file 1 [file 13851044]

**Supplementary material from "The demography of a resource specialist in the tropics: Cecropia trees and the fitness of three-toed sloths**

**Methods S1. Comparing threat to mammalian arboreal folivores with all other mammalian species**

We used the full list of all known mammals assessed using the IUCN Red List categories and criteria corresponding to version 2017-3 [1]. We considered threatened species as those Critically Endangered, Endangered, or Vulnerable [2]. Then, we assessed the level of threat for the 260 species of mammals identified as arboreal folivores [3]. As arboreal folivores represent a diverse group of Mammals, we also compared by order. We did not include order Carnivora given the low representation of mammalian arboreal folivores in this group (only one species); however, this species is classified as vulnerable. We also excluded the orders Dermoptera and Hyracoidea due the lack of threatened species in these groups of mammals.

- 1 IUCN 2017. *The IUCN Red List of Threatened Species. Version 2017-3*.  
<<http://www.iucnredlist.org>>. Downloaded on 06 May 2018.
- 2 Eisenberg JF. 1978 The evolution of arboreal herbivores in the class mammalia. In *The ecology of arboreal folivores* (ed. GG Montgomery), pp. 135–152. Washington, DC: Smithsonian Institution Press.
- 3 Mounce R, Rivers M, Sharrock S, Smith P, Brockington S. 2017 Comparing and contrasting threat assessments of plant species at the global and sub-global level. *Biodivers. Conserv.* **27**, 907–930. (doi:10.1007/s10531-017-1472-z)

**Supplementary material from "The demography of a resource specialist in the  
tropics: Cecropia trees and the fitness of three-toed sloths**

**Methods S2. Range of distribution of three-toed sloths (*Bradypus* spp.) and trees of the  
genus *Cecropia* in Neotropical areas**

To build the distribution of the genus *Cecropia*, we combined the distributions for all the species of this genus following the proposed by Berg et al. 2005 [1]. We compiled the distribution of the genus *Bradypus* from spatial data housed at the IUCN Red List version 2018-1 [2].

- 1 Berg, C. C., Rosselli, P. F., & Davidson, D. W. 2005. *Cecropia*. *Flora Neotrop.* **94**, 1–230.
- 2 IUCN 2017. *The IUCN Red List of Threatened Species. Version 2018-1*. <<http://www.iucnredlist.org>>. Downloaded on 26 August 2018.

**Supplementary material from "The demography of a resource specialist in the tropics: *Cecropia* trees and the fitness of three-toed sloths**

**Methods S3. Density of *Cecropia obtusifolia* in Neotropical areas**

We conducted a search of articles and books in different search engines such as google scholar, Scielo, Springer Link that reported density of *Cecropia obtusifolia* in neotropical areas using as keywords: *Cecropia obtusifolia*, guarumo and yarumo. We found seven results which report the density of *C. obtusifolia* [1,2,3,4,5,6,7] distinguishing the type of habitat in which this species is present.

- 1 Arroyo-Rodríguez V, Mandujano S, Benítez-Malvido J, Cuende-Fanton C. 2007 The Influence of Large Tree Density on Howler Monkey (*Alouatta palliata mexicana*) Presence in Very Small Rain Forest Fragments. *Biotropica* 39, 760–766. (doi:10.1111/j.1744-7429.2007.00330.x)
- 2 Hartshorn GS. 1978. Tree falls and tropical forest dynamics. In *Tropical trees as living systems* (eds. PB Tomlinson, MH Zimmermann), pp. 617–638. Cambridge: Cambridge University Press.
- 3 López-Mata L, Godínez-Ibarra O. 2002. Estructura, composición, riqueza y diversidad de árboles en tres muestras de selva mediana subperennifolia. *Anales del Instituto de Biología serie Botánica* 73, 283–314.
- 4 Sánchez-Rodríguez EV, López-Mata L, García-Moya E, Cuevas-Guzmán R. 2003. Estructura, composición florística y diversidad de especies leñosas de un bosque mesófilo de montaña en la Sierra de Manantlán, Jalisco. *Boletín de la Sociedad Botánica de México* 73, 17–34.

**Supplementary material from "The demography of a resource specialist in the  
tropics: Cecropia trees and the fitness of three-toed sloths**

- 5 Muñoz D, Estrada A, Naranjo E. 2005. Monos aulladores (*Alouatta palliata*) en una plantación de cacao (*Theobroma cacao*) en Tabasco, México: aspectos de la ecología alimentaria. Universidad y Ciencia 2005, 35–44.
- 6 Sánchez-Merlos D, Harvey CA, Grijalva A, Medina A, Hernández B, Vélchez S. 2014 Diversidad, composición y estructura de la vegetación en un agropaisaje ganadero en Matiguás, Nicaragua. Revista de Biología Tropical 53, 387.  
(doi:10.15517/rbt.v53i3-4.14601)
- 7 Escobar-Ocampo M, Ochoa-Gaona S. 2007 Estructura y composición florística de la vegetación del Parque Educativo Laguna Bélgica, Chiapas, México. Revista mexicana de biodiversidad 78, 391–419.

**Supplementary material from "The demography of a resource specialist in the tropics: Cecropia trees and the fitness of three-toed sloths**

Table S1. Rankings of known fate models estimating survival ( $\phi$ ) a probabilities for 2-3 year old juveniles three-toed sloths in northeastern Costa Rica. AICc = Akaike information criterion corrected for small sample sizes,  $K$  = number of parameters,  $w$  = AICc weight, st = stages (dependent, independent). Models are ranked based on AICc. The order in which the models were computed is shown in bold numbers.

| Model          | $K$ | AICc   | $\Delta$ AICc | $w$  |
|----------------|-----|--------|---------------|------|
| <b>2</b> S (.) | 1   | 20.498 | 0.000         | 1.00 |
| <b>1</b> S (t) | 19  | 62.229 | 41.731        | 0    |

Supplementary material from "The demography of a resource specialist in the  
tropics: *Cecropia* trees and the fitness of three-toed sloths

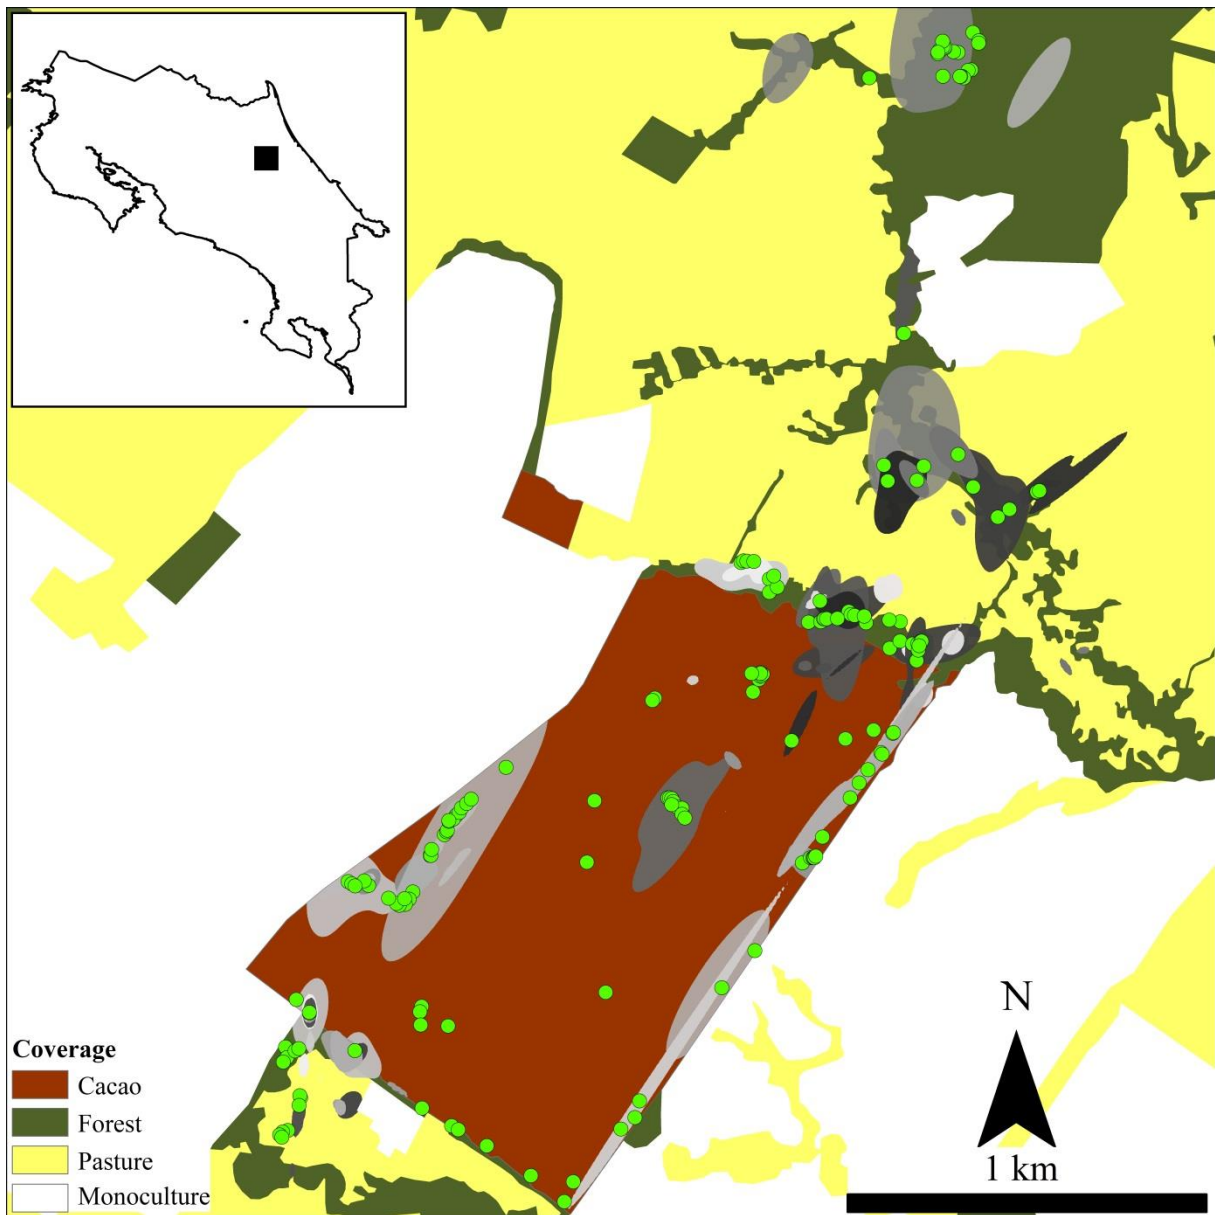

Figure S1. Location of *Cecropia obtusifolia* (green dots) and core area (grey scale polygons) of adult of three-toed sloths (*Bradypus variegatus*) in northeaster Costa Rica.

Supplementary material from "The demography of a resource specialist in the  
tropics: *Cecropia* trees and the fitness of three-toed sloths

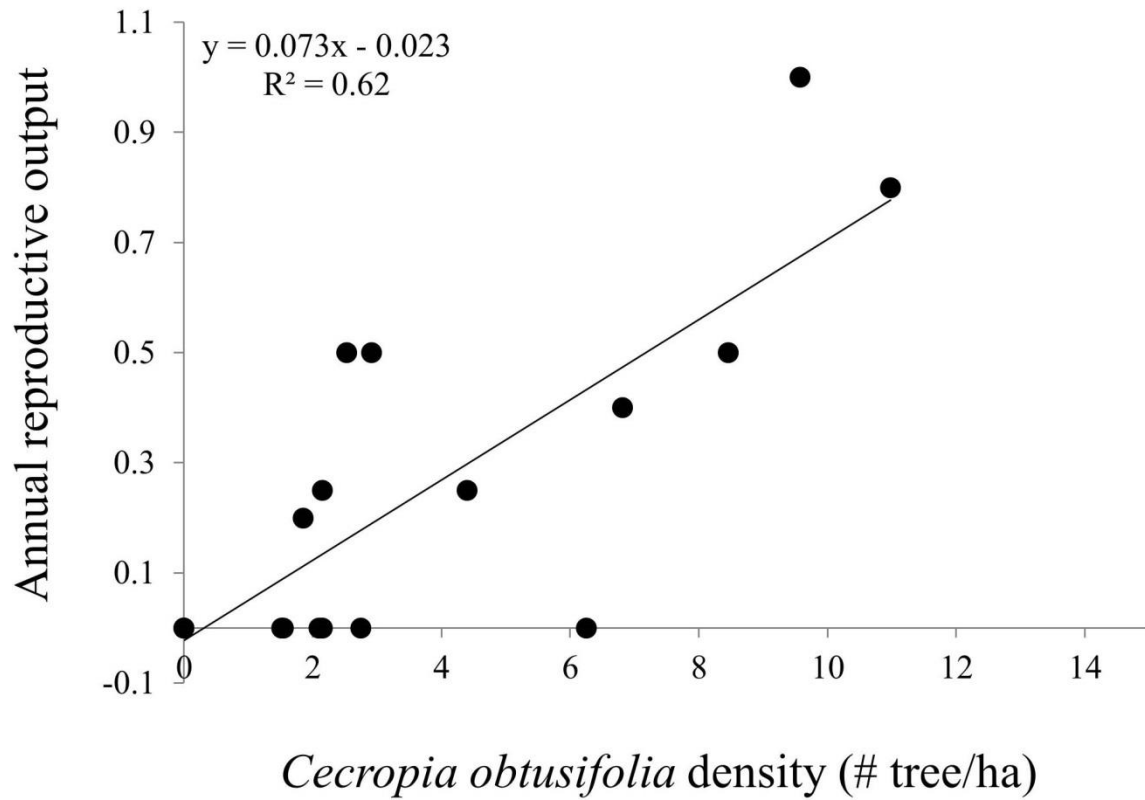

Figure S2. Relationship between *Cecropia obtusifolia* density and the index of reproductive output of males excluding a single male with unusually high reproductive output. Mean reproductive output increase with increasing of the density of *Cecropia obtusifolia* in the core area for male three-toed sloths ( $F_{1, 34} = 7.31$ ,  $P < 0.01$ ).
